# Supplementary material
Source: PubMed Central journal article supplement (PMC3416467)
Supplement: supp_80.7.2500_IAI-IAI06350-11-s01.pdf [file supp_80.7.2500_IAI-IAI06350-11-s01.pdf]

**Table S1.** Oligonucleotides used in this study (f indicates forward primer and r indicates reverse primer).

| Genes            | Sequence                                                           |
|------------------|--------------------------------------------------------------------|
| <i>asp-1</i>     | f: 5'-CGTCCTTGACCTTCAACTCG-3'<br>r: 5'-ACGGATGAAGGTGTCTCAA-3'      |
| <i>C15C8.3</i>   | f: 5'-ATCGGAGCACCAAAGAGTGT-3'<br>r: 5'-AAGAATGCACCCGTAAGTGG-3'     |
| <i>cpr-1</i>     | f: 5'-AAAGTACCTCGGAGGACACG-3'<br>r: 5'-ATTCCGCATTGATCATCTCC-3'     |
| <i>cpr-2</i>     | f: 5'-CAGAACGACCTACACCAACG-3'<br>r: 5'-CGGTTCTTGGAACAGGGTAT-3'     |
| <i>cpr-4</i>     | f: 5'-GGAACTCCATACTGGCTTGTTG-3'<br>r: 5'-CGTTGGTTCCACGGATGATAC-3'  |
| <i>cpr-5</i>     | f: 5'-GACAACGGAACCCATACTG-3'<br>r: 5'-CTCGATTCCCACTCGTTGA-3'       |
| <i>thn-2</i>     | f: 5'-CCTACGGAACCTCAGACAAGTG-3'<br>r: 5'-CGTCGTAGGCATAGGAATAAGC-3' |
| <i>lys-5</i>     | f: 5'-TCCCAGAATTTATCATTATC G-3'<br>r: 5'-TGGCATTCTTGACATTTTGC-3'   |
| <i>F53A9.8</i>   | f: 5'-GCGCTAAAACTCAACACCAA-3'<br>r: 5'-ATGTCCTTCATGGGAGTCGT-3'     |
| <i>clec-52</i>   | f: 5'-ATGGAGGAGATTTGGCTTCA-3'<br>r: 5'-CCTGTCCAATCCTTGTCTT-3'      |
| <i>clec-60</i>   | f: 5'-ACGGGCAAGTTATTGGAGAG-3'<br>r: 5'-ACACGGTATTGAATCCACGA-3'     |
| <i>clec-71</i>   | f: 5'-CGGTATCGAGCAAGACTCA-3'<br>r: 5'-GCATTGACGGCATATATTGG-3'      |
| <i>fmo-2</i>     | f: 5'-AAGCTGGAGACACGAGGATT-3'<br>r: 5'-GGAGTTAAGCATAGCTTGAGGAA-3'  |
| <i>ilys-3</i>    | f: 5'-GCGAATGATCTTAGCTGTGC-3'<br>r: 5'-CCAGTTCCAGCACATTGACT-3'     |
| <i>F53A9.8</i>   | f: 5'-GCGCTAAAACTCAACACCAA-3'<br>r: 5'-ATGTCCTTCATGGGAGTCGT-3'     |
| <i>T24B8.5</i>   | f: 5'-GTCGACTCAAGACCATCATGC-3'<br>r: 5'-GAGTATCGGTAACGCAGACACC-3'  |
| <i>C32H11.1</i>  | f: 5'-TTTTGGAAACTACACCCAAGG-3'<br>r: 5'-TGTTGGATCATTGAGGGTA-3'     |
| <i>C32H11.12</i> | f: 5'-GTGTCCAACACAACCTGCAT-3'<br>r: 5'-CATGTTTCCATTCACCTGGA-3'     |
| <i>K08D8.5</i>   | f: 5'-ATGCTACCGAATGCTTTTCC-3'<br>r: 5'-TCCTTGGGTGTAGTTTCAA-3'      |
| <i>C17H12.8</i>  | f: 5'-CCTCCAACCTCATCATCTGAA-3'<br>r: 5'-TTTGTGGGTGATGTTTCTCG-3'    |
| <i>F35E12.5</i>  | f: 5'-ATTGTCCCAACACAGAAGC-3'<br>r: 5'-GGTAGTCATTGGAGCCGAAA-3'      |
| <i>sod-3</i>     | f: 5'-AAATGTCCGCCAGACTATG-3'<br>r: 5'-TGGCAAATCTCTCGCTGA-3'        |
| <i>sod-5</i>     | f: 5'-GGTGAAGAGACCGAATTC-3'                                        |

*mtl-1* r: 5'-CTTGATCTTCGCAACTCC-3'  
f: 5'-TGCAGTCTCCCTTACATCCA-3'

*hsp16.2* r: 5'-TGCAGTGGAGACAAGTGTTG-3'  
f: 5'-TATGGCTCTGATGGAACG-3'

*old-1* r: 5'-GATTGATAGCGTACGACC-3'  
f: 5'-AAGTGATGTGTGCAGTCG-3'

*gst-10* r: 5'-GAGAGCCAAATCACGATG-3'  
f: 5'-GACTGGAGCAATTATGCGTCA-3'

*tor-1* r: 5'-TCGAAGAACATGTCGAGGAAG-3'  
f: 5'-AGAATCCTCTGATCTGTGATTGTCA-3'

*pik-1* r: 5'-GTAGATCCTTCTTGCTGAGACTTTG-3'  
f: 5'-CTTATTGTGAACTTCTCGAAGCAAC-3'

*trf-1* r: 5'-GTTAAACTCTGTCGAAGTCGTTCTC-3'  
f: 5'-AGTCGTTTGCACTTTTGAGTCTTC-3'

*ibk-1* r: 5'-GTCTTGTTACAAAATGAGCAGACAG-3'  
f: 5'-GTTACACAGTCCCTTCTCTGAAAGTA-3'

*tir-1* r: 5'-GCTGAAGTAATGAAATTGTGTCTCC-3'  
f: 5'-CCTATAAACTCGCTCAACAAGTACC-3'

*snb-1* r: 5'-CATCATGCTTCAGATCATTCTCAGT-3'  
f: 5'-CCGATAAGACCATCTTGACG-3'  
r: 5'-GACGACTTCATCAACCTGAGC-3'

---

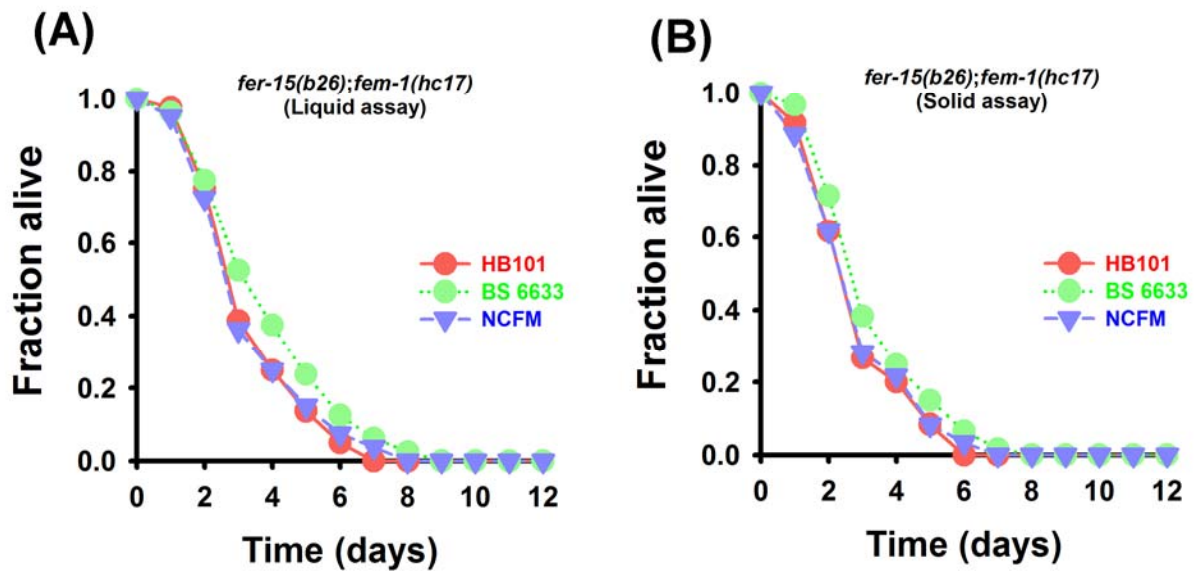

**Figure S1.** Heat-killed *L. acidophilus* NCFM and *B. subtilis* ATCC 6633 have no effect in the survival of *C. elegans* nematodes infected with *E. faecalis* MMH594. (A) Liquid killing assay (n=40 per well) and (B) solid killing assay (n=30 per plate) of *C. elegans fer-15;fem-1* worms infected by *E. faecalis* MMH594 following conditioning with heat-killed *L. acidophilus* NCFM or *B. subtilis* ATCC 6633 cells for 24 h (liquid killing assay [p=0.7702 and p=0.0623 compared with worms feeding on HB101, respectively] and Solid killing assay [p=0.7872 and p=0.0813 compared with worms feeding on HB101, respectively]).

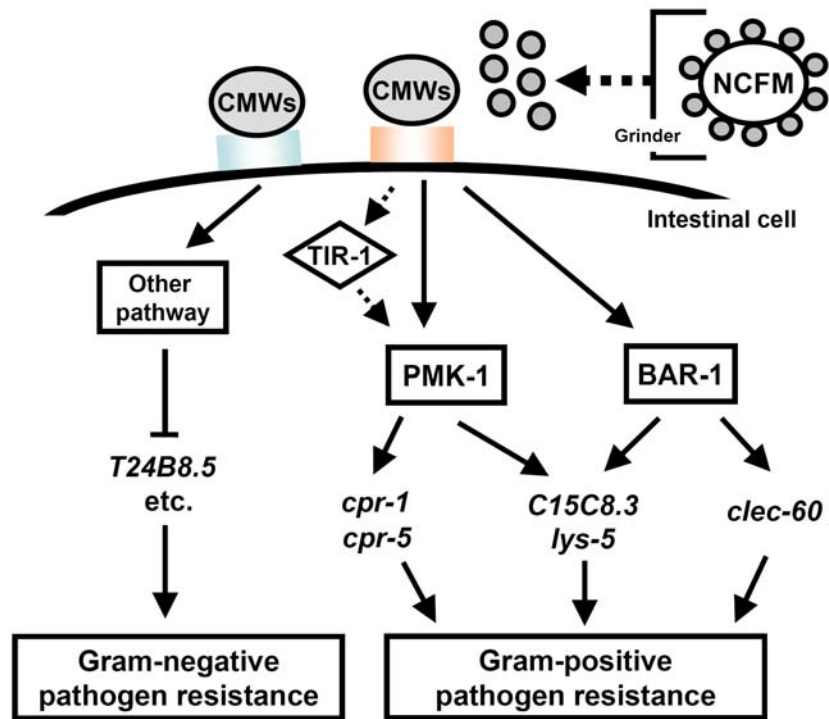

**Figure S2.** Proposed model of the conditioning mechanism associated with *C. elegans* exposure to NCFM probiotic bacteria. Our working hypothesis is that when intact probiotic cells are digested by the worm grinder, cell wall molecules (CMWs) up-regulate specific host immune responses. These probiotic ligands may stimulate immune response genes resulting in lower infection levels and prolonged survival during Gram-positive infections via the TIR-1, PMK-1 and BAR-1 pathways. → indicates induction, ⊥ indicates repression.
